# Supplementary material for: Sequential vacuum-evaporated perovskite solar cells with more than 24% efficiency
Source: PubMed Central journal article supplement — Sci Adv. 2022 Jul 15;8(28):eabo7422. doi: 10.1126/sciadv.abo7422 (PMC10942770; doi:10.1126/sciadv.abo7422), 2022-07-15
Supplement: sciadv.abo7422_sm.pdf [file sciadv.abo7422_sm.pdf]

Supplementary Materials for  
**Sequential vacuum-evaporated perovskite solar cells with more  
than 24% efficiency**

Hang Li *et al.*

Corresponding author: Chenyi Yi, [yicy@mail.tsinghua.edu.cn](mailto:yicy@mail.tsinghua.edu.cn), [yicy@tsinghua.edu.cn](mailto:yicy@tsinghua.edu.cn)

*Sci. Adv.* **8**, eabo7422 (2022)  
DOI: 10.1126/sciadv.abo7422

**The PDF file includes:**

Figs. S1 to S32  
Legends for movies S1 and S2

**Other Supplementary Material for this manuscript includes the following:**

Movies S1 and S2

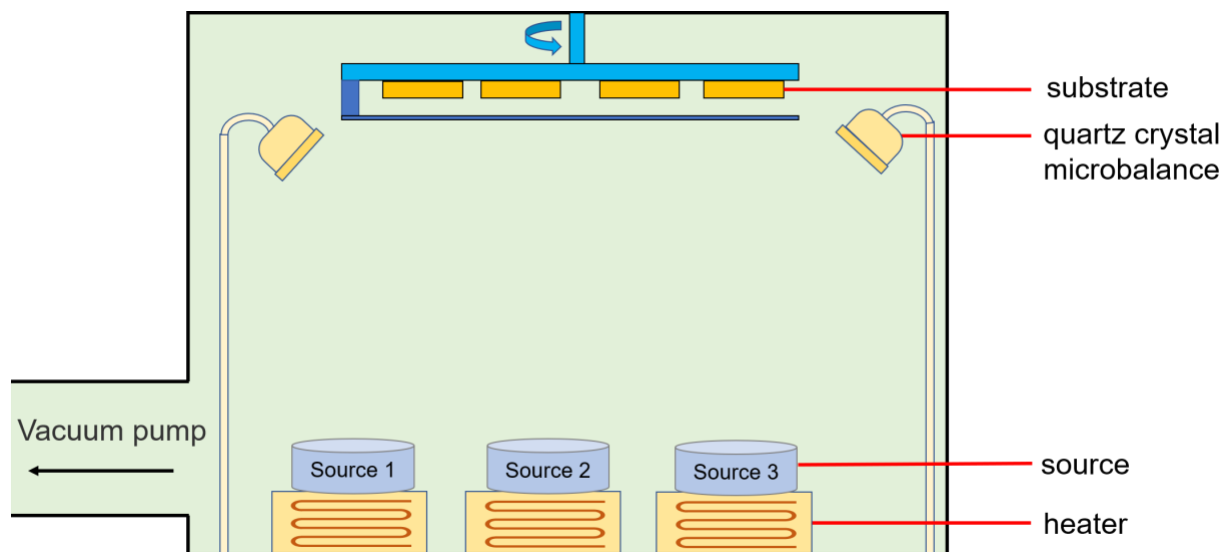

**Fig. S1. Schematic illustration of vacuum chambers for the evaporation of lead halide film and FAI film.**

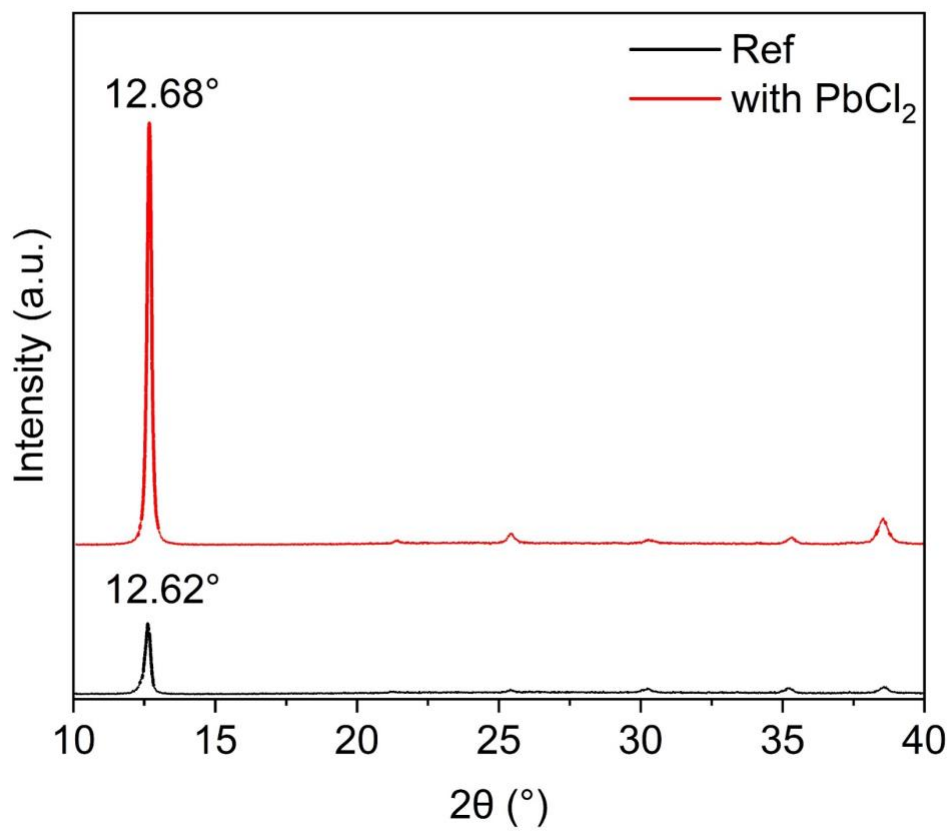

**Fig. S2. XRD patterns of  $\text{Cs}_{0.05}\text{PbI}_{2.05-x}\text{Cl}_x$  film and the  $\text{Cs}_{0.05}\text{PbI}_{2.05}$  film.**

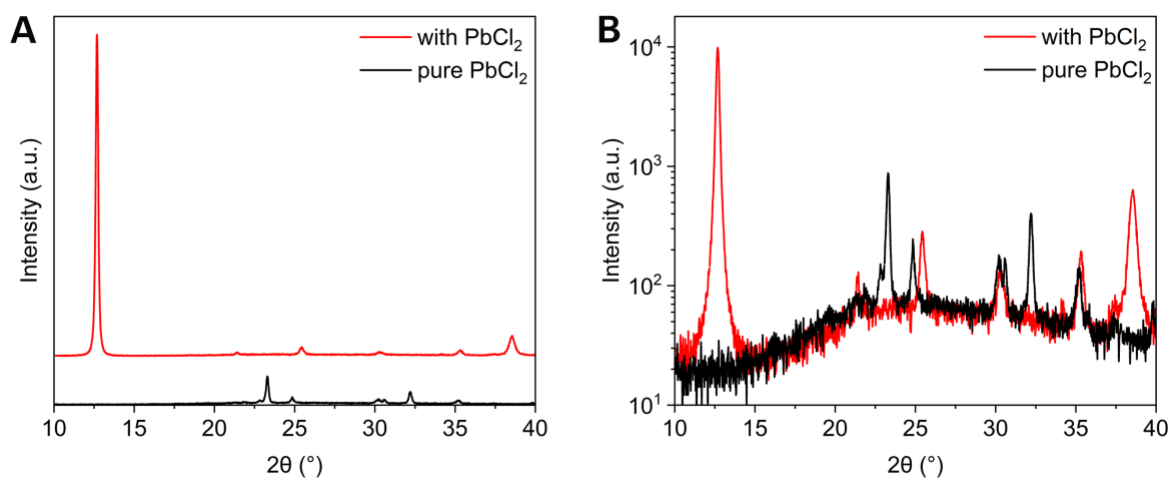

**Fig. S3. XRD patterns of  $\text{Cs}_{0.05}\text{PbI}_{2.05-x}\text{Cl}_x$  film and pure  $\text{PbCl}_2$  film with (A) linear Y scale and (B) log Y scale.**

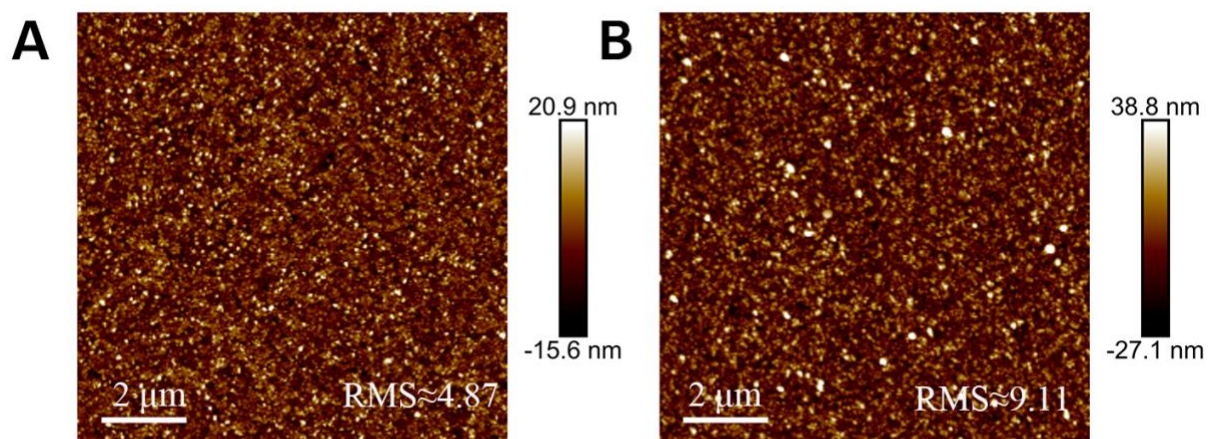

**Fig. S4. AFM images of (A)  $\text{Cs}_{0.05}\text{PbI}_{2.05-x}\text{Cl}_x$  film and (B)  $\text{Cs}_{0.05}\text{PbI}_{2.05}$  film.**

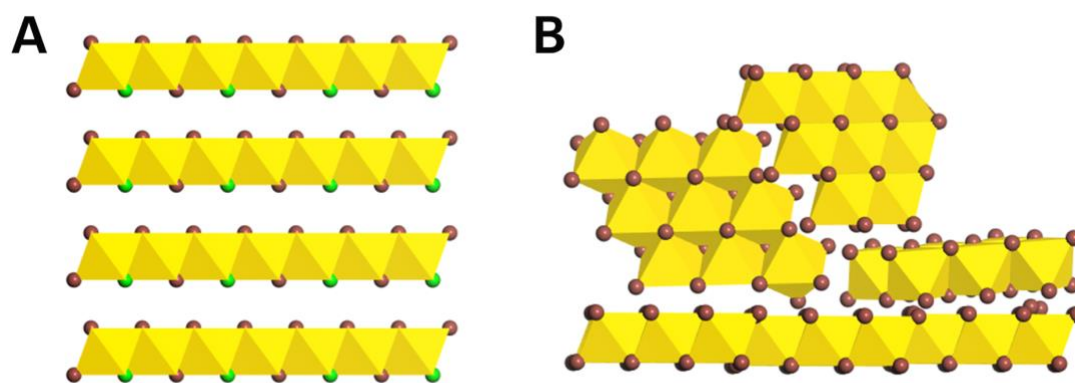

**Fig. S5. Schematic illustrations of the lead halide skeleton orientation.**

Lead halide skeleton orientation of (A) Cs<sub>0.05</sub>PbI<sub>2.05-x</sub>Cl<sub>x</sub> film (B) Cs<sub>0.05</sub>PbI<sub>2.05</sub> film. The green atom represents chlorine and the brown for the iodine.

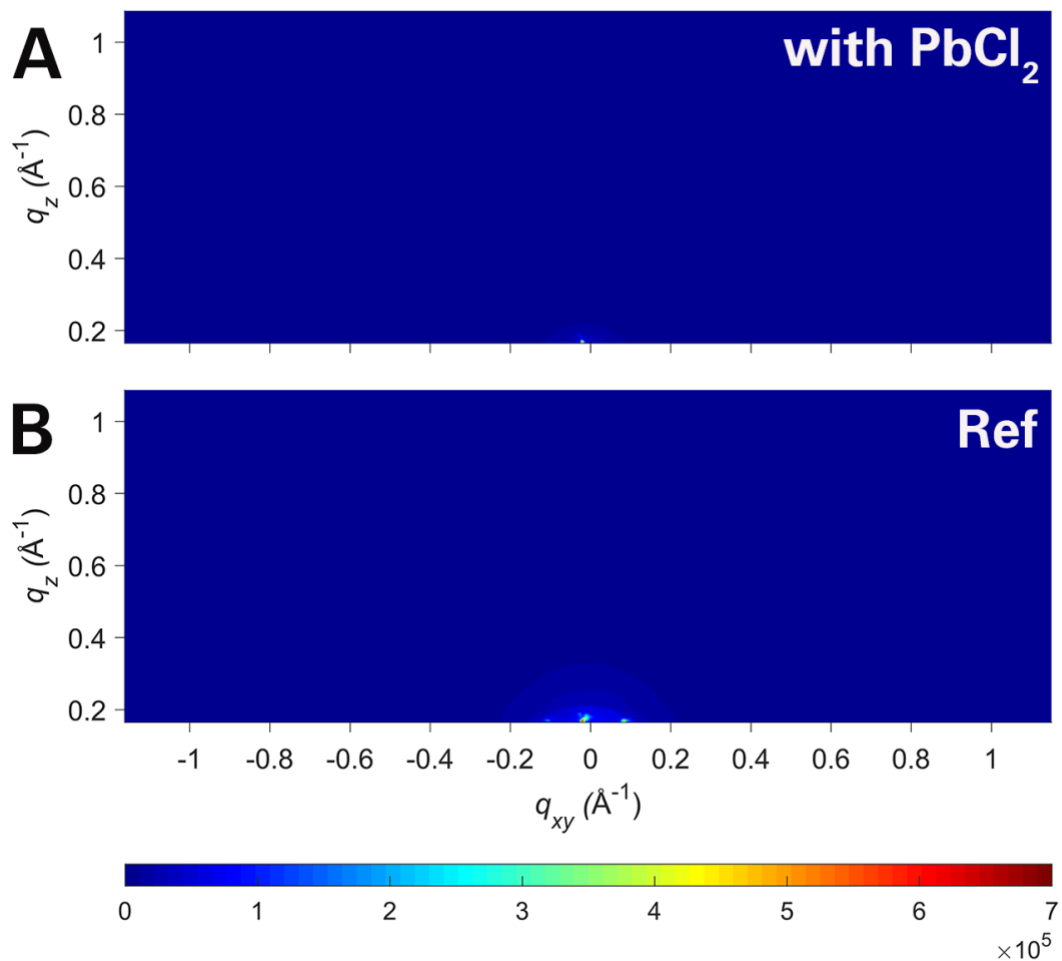

**Fig. S6.** GIWAXS patterns of (A) the Cl-alloy mediated film and (B) the Ref film at an incident angle of  $0.1^\circ$  before annealing.

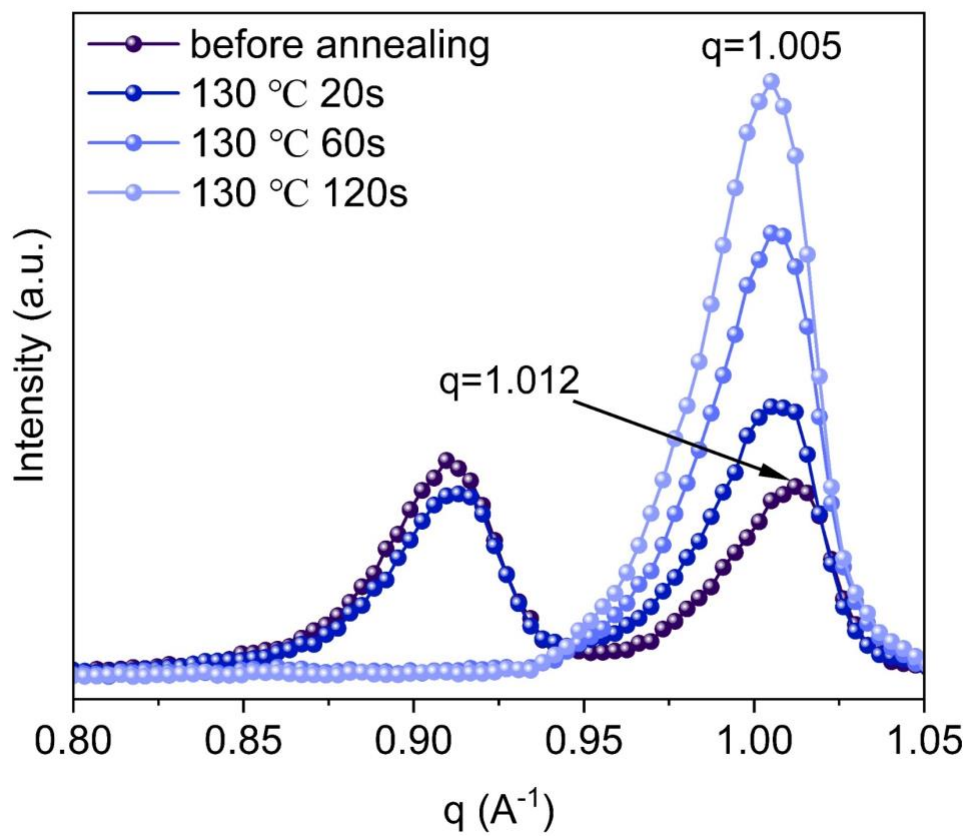

**Fig. S7. In-situ GIXRD characterization of Cl-alloy mediated perovskite film with different annealing time at 130°C.**



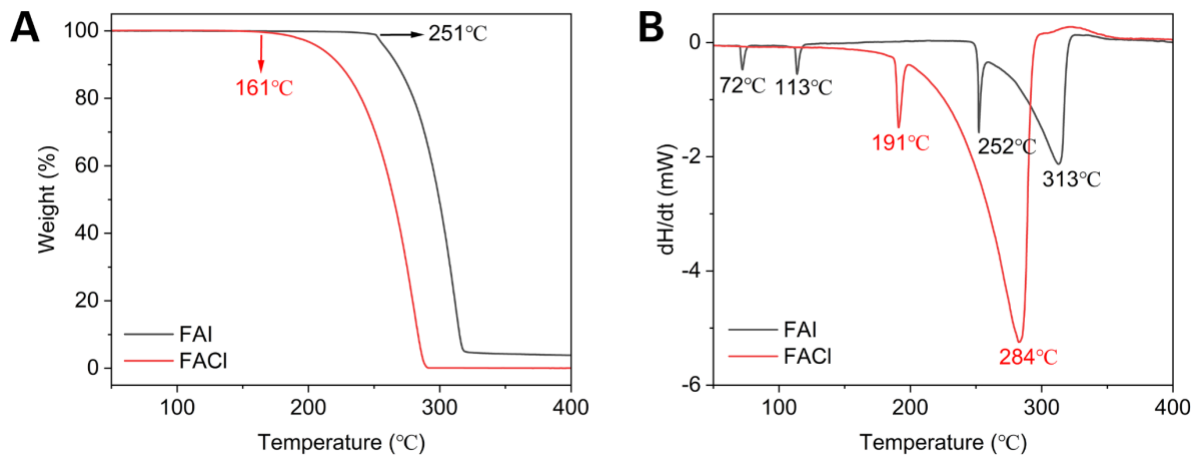

**Fig. S8. TGA (A) and DSC (B) results of FAI and FAcI powders.**

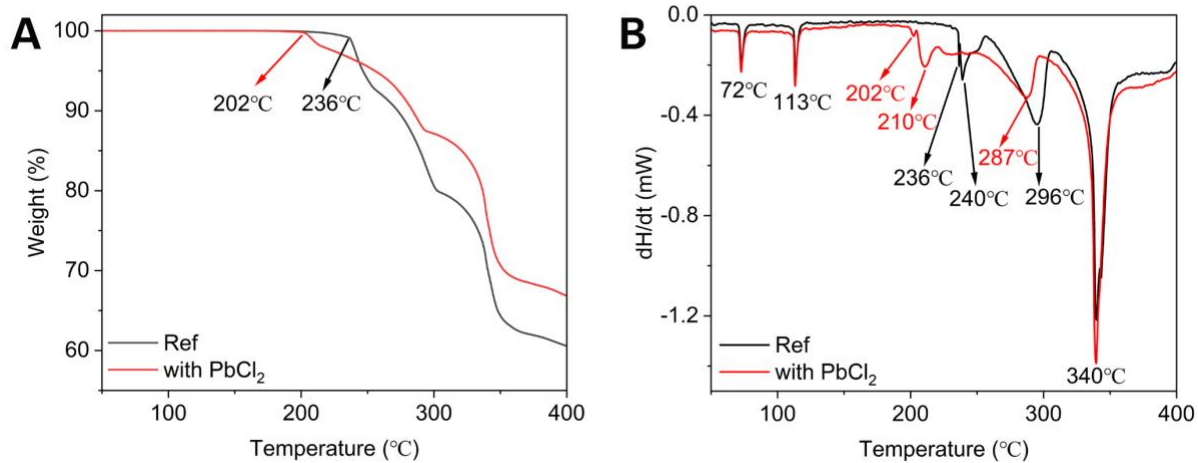

**Fig. S9. TGA (A) and DSC (B) results of the powders with the composition of the Cl-alloy mediated perovskite film and the Ref film.**

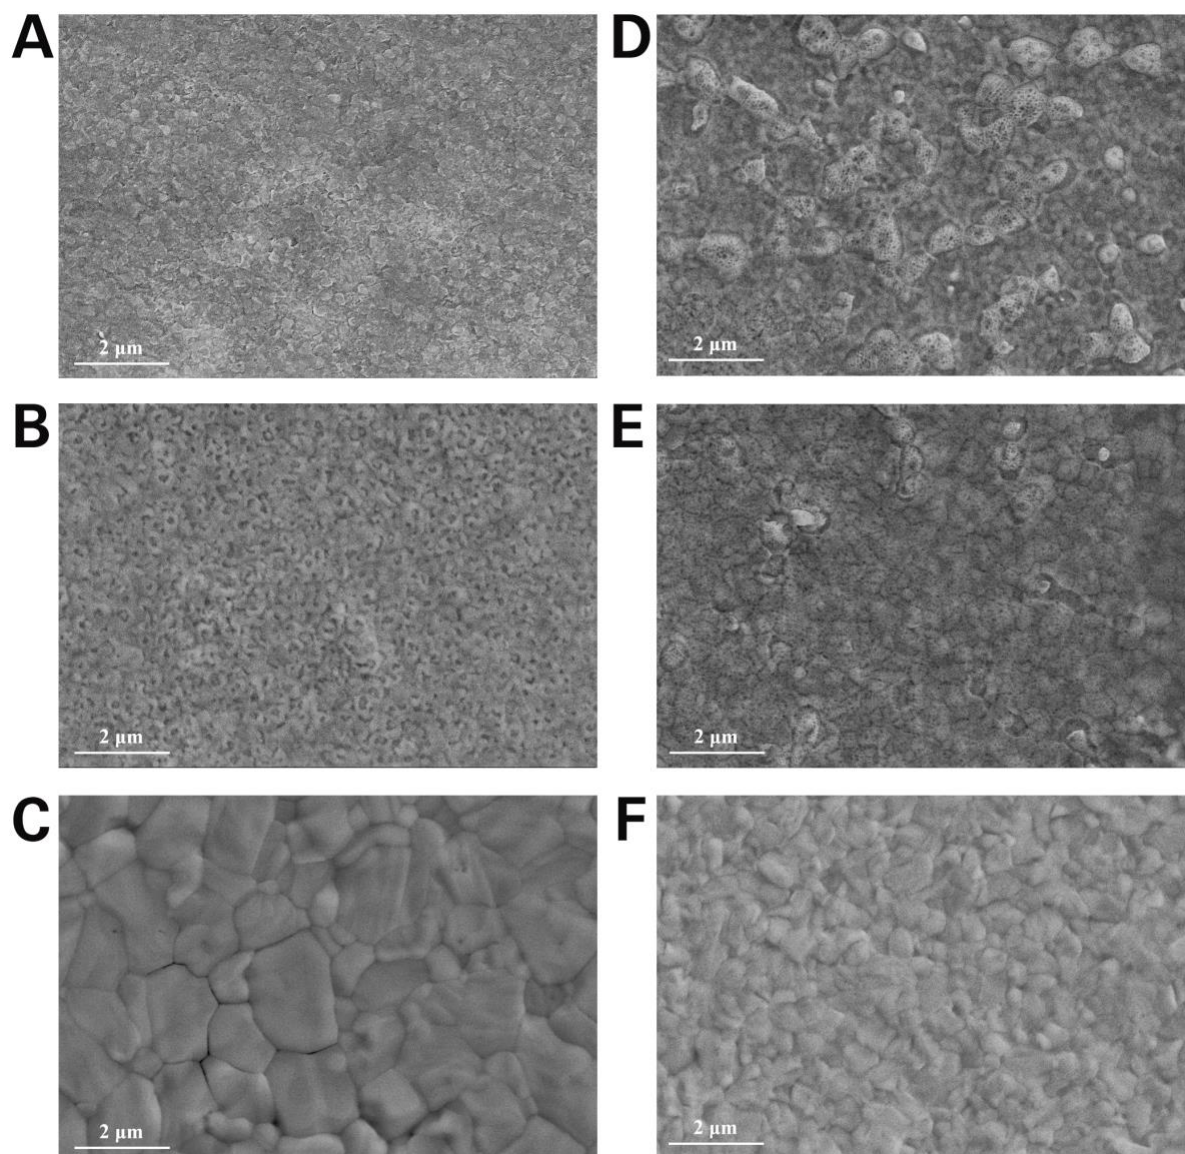

**Fig. S10. Morphology evolution of perovskite film surface during the annealing process.**

(A to C) SEM images of the C1-alloy mediated film at different annealing temperature with different annealing time in ambient air. (A) without annealing (B) 130°C 30 s (C) 170°C 1 min. (D to F) SEM images of the Ref film at different annealing temperature with different annealing time in ambient air. (D) without annealing (E) 130°C 30 s (F) 170°C 1 min.

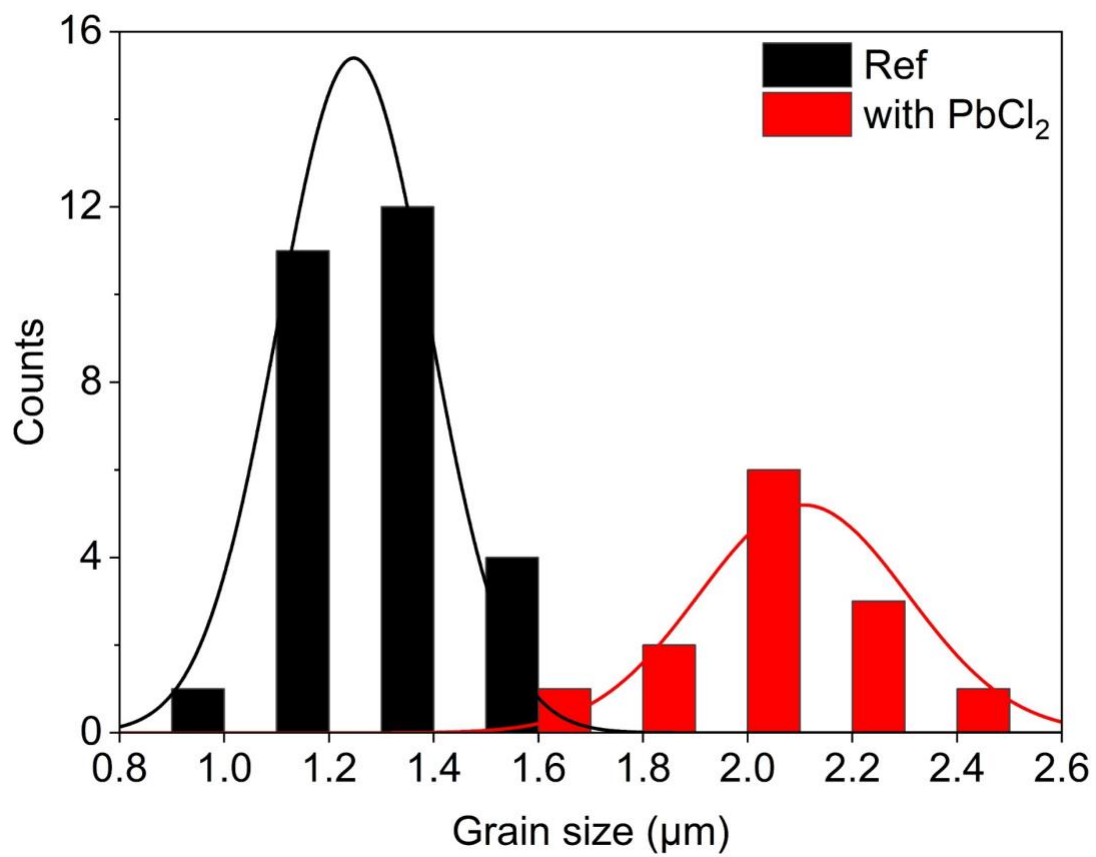

**Fig. S11. Grain size statistics of the Cl-alloy mediated perovskite film and the Ref film.**

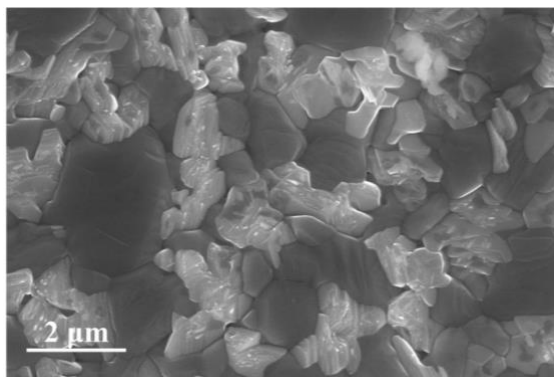

**Fig. S12. Top-view SEM images of the Cl-alloy mediated perovskite film.**  
The SEM detector is InlensDuo.

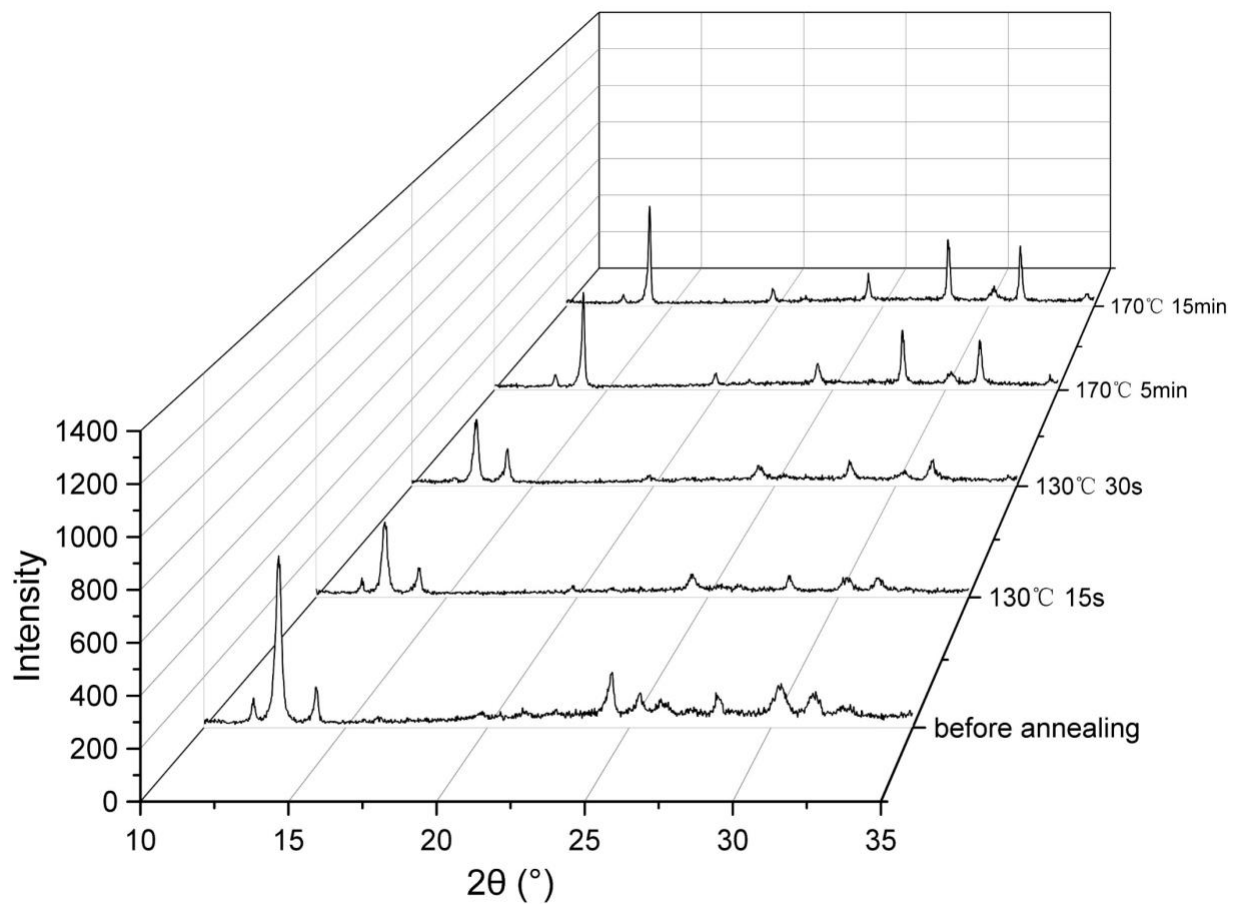

**Fig. S13. XRD patterns of the Ref perovskite films with different annealing temperature and time.**

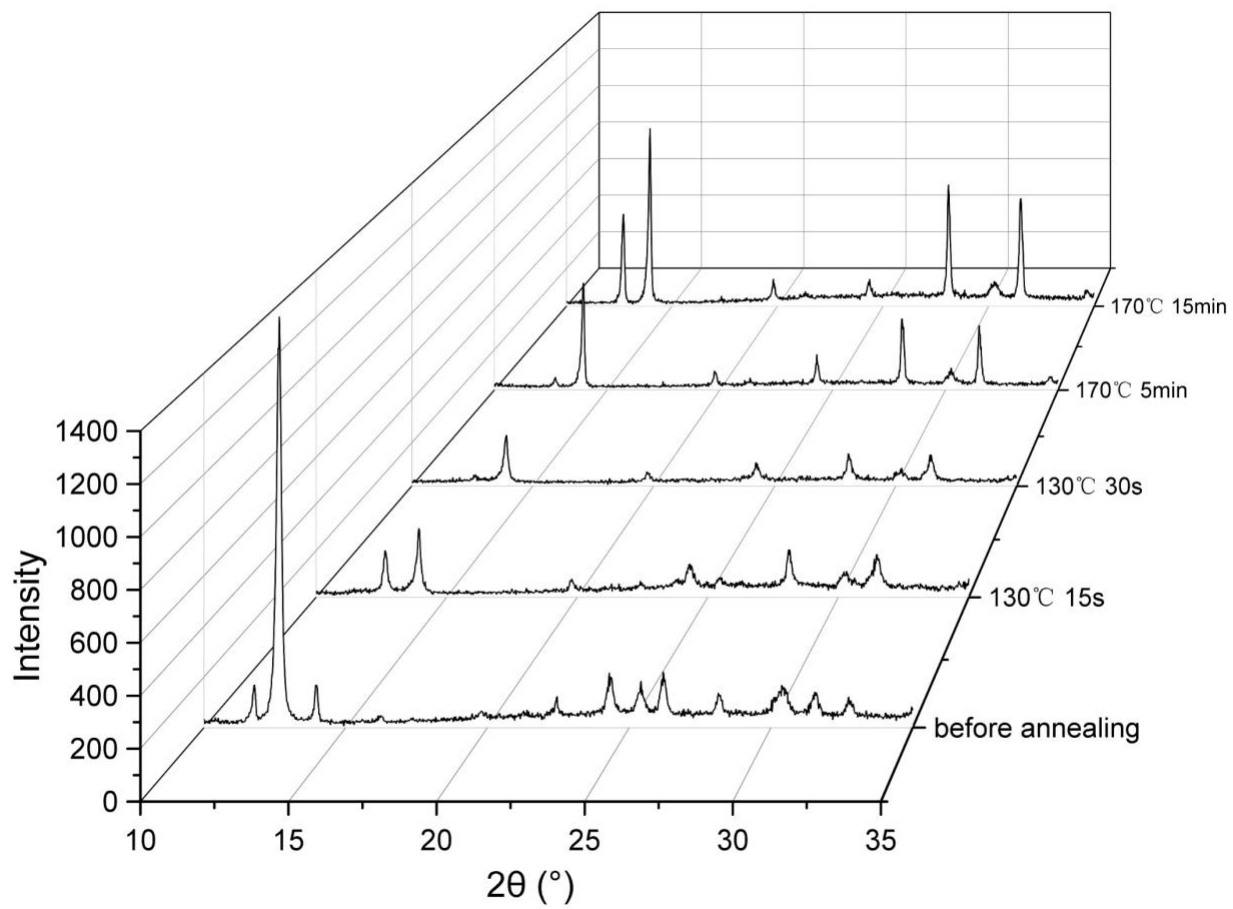

**Fig. S14. XRD patterns of the CI-alloy mediated perovskite films with different annealing temperature and time.**

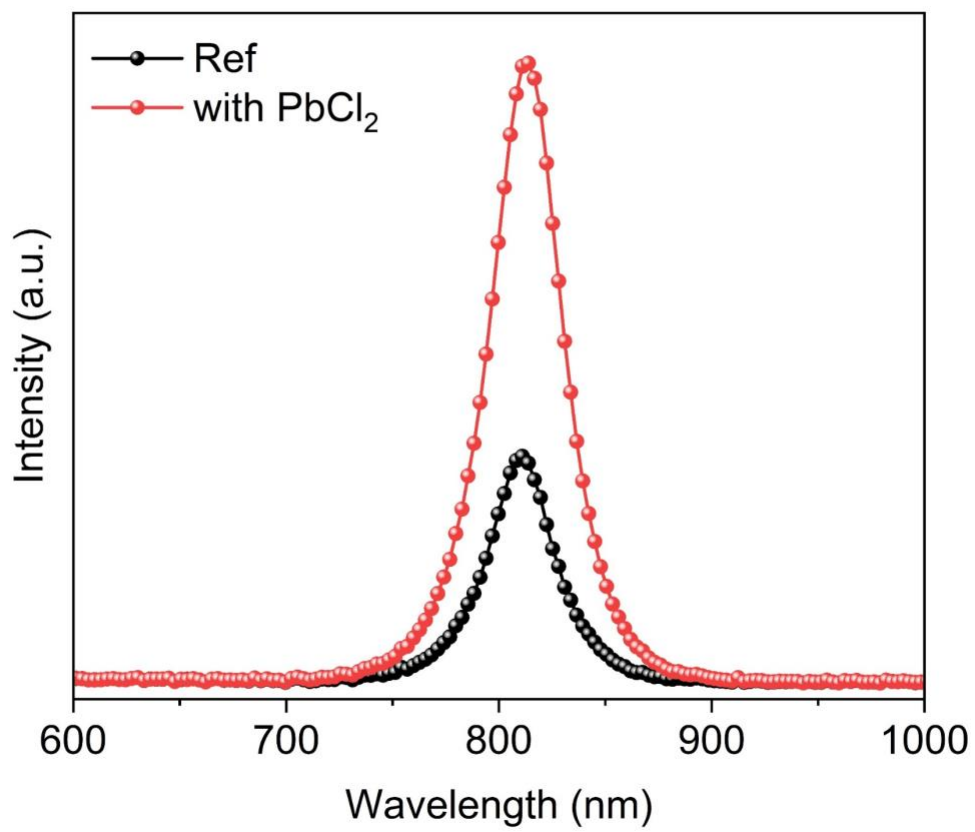

**Fig. S15.** EL spectra of the Ref PSC and Cl-alloy-mediated PSC measured under 1.5 V bias voltage.



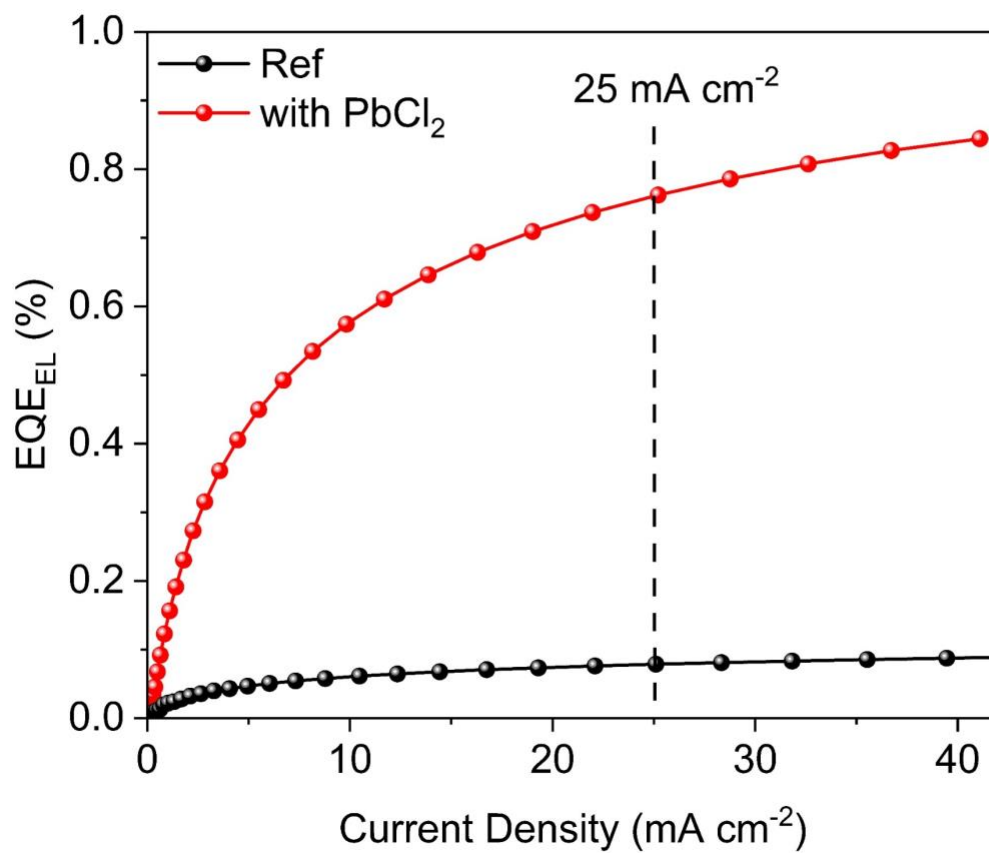

**Fig. S16.** EQE curves of EL on the Cl-alloy mediated PSC and the Ref PSC under different current densities.

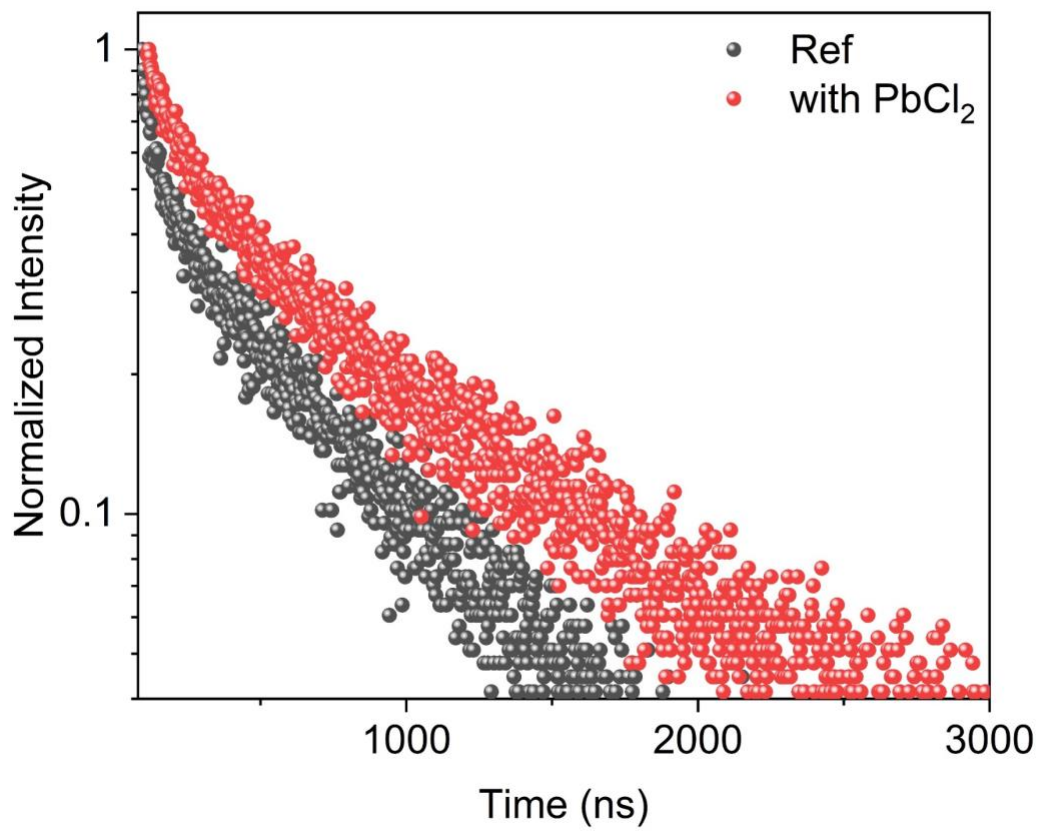

**Fig. S17. TRPL spectroscopy of the Cl-alloy mediated perovskite film and the Ref film.**

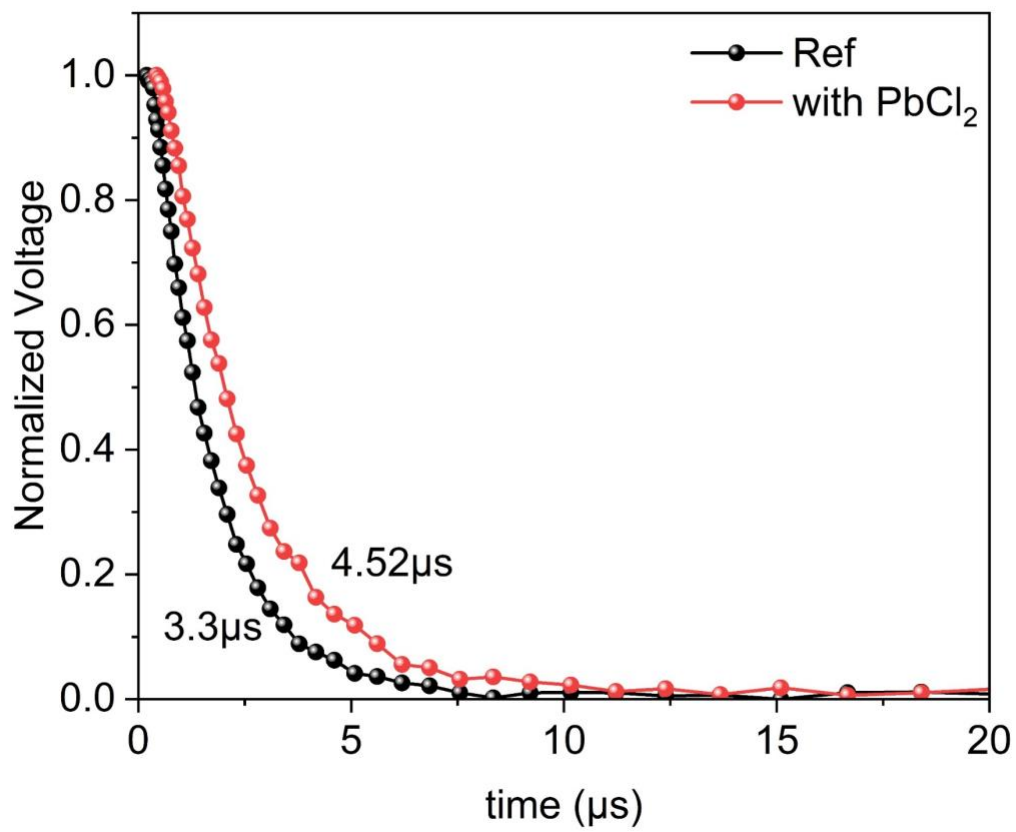

Fig. S18. Normalized TPV curves of Ref and Cl-alloy mediated PSCs.

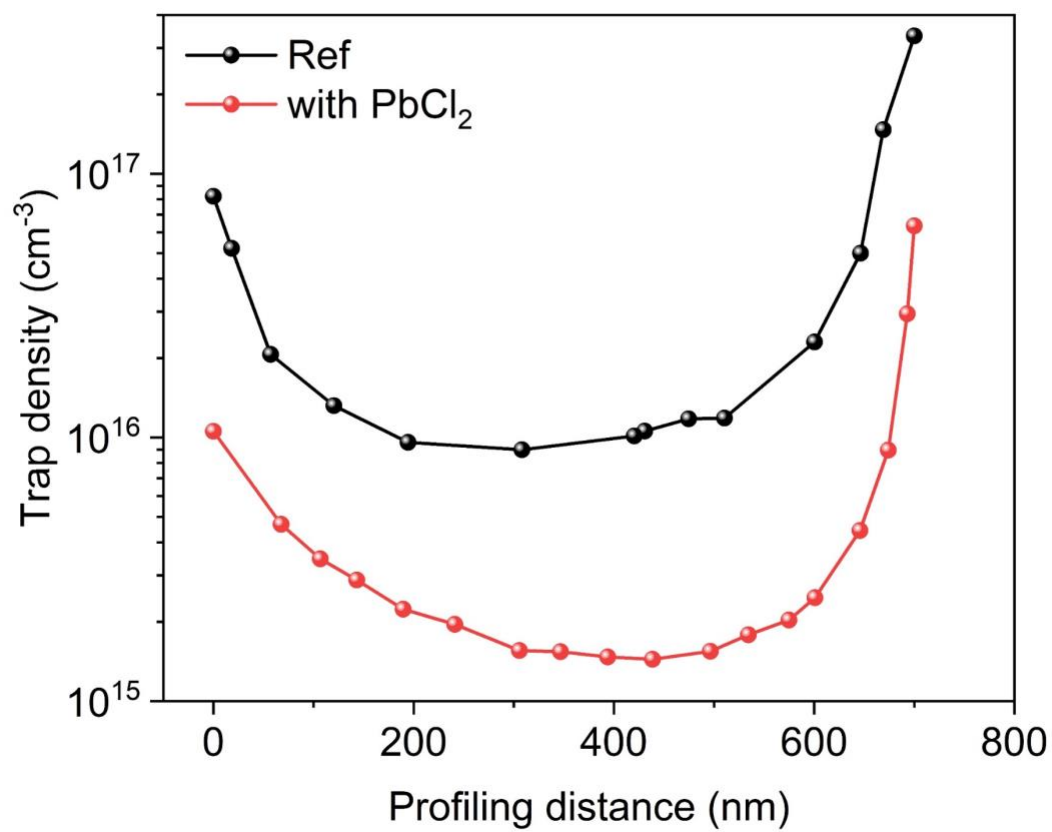

**Fig. S19. Dependence of the trap density on the profiling distance for the Ref and Cl-alloy mediated PSCs measured at an AC frequency of 10 kHz.**

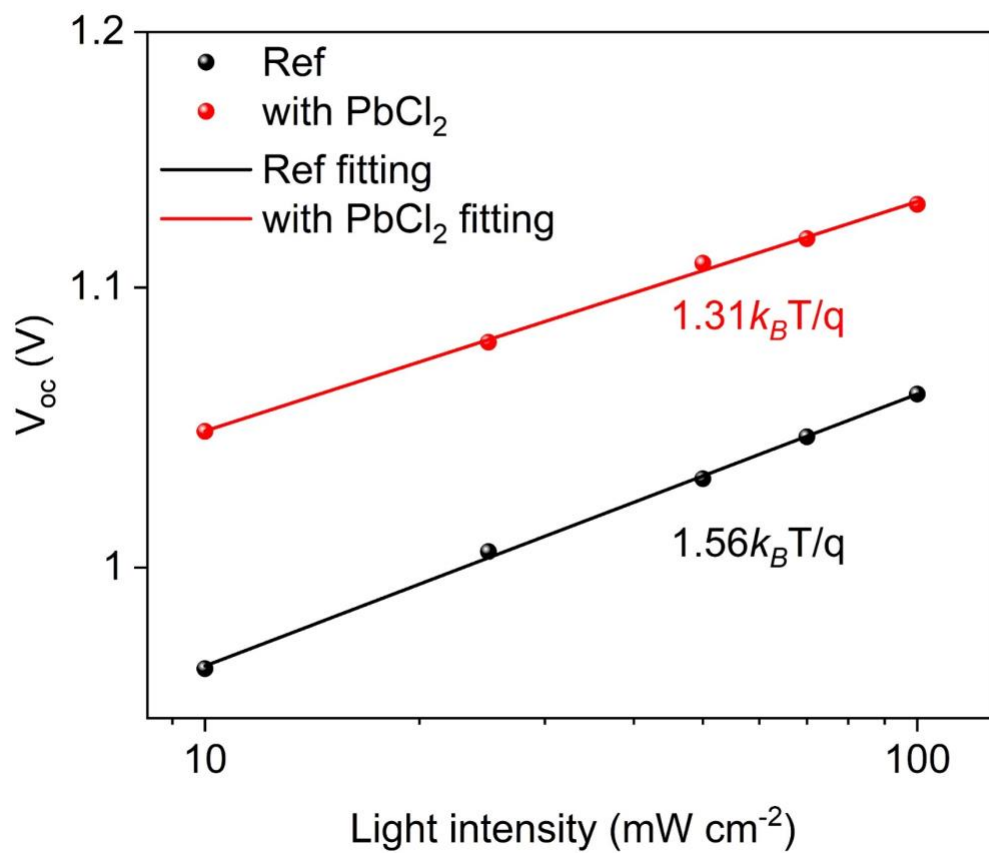

**Fig. S20. Light intensity dependence of the  $V_{oc}$  of PSCs.**

$k_B$  is the Boltzmann constant and T is the absolute temperature.

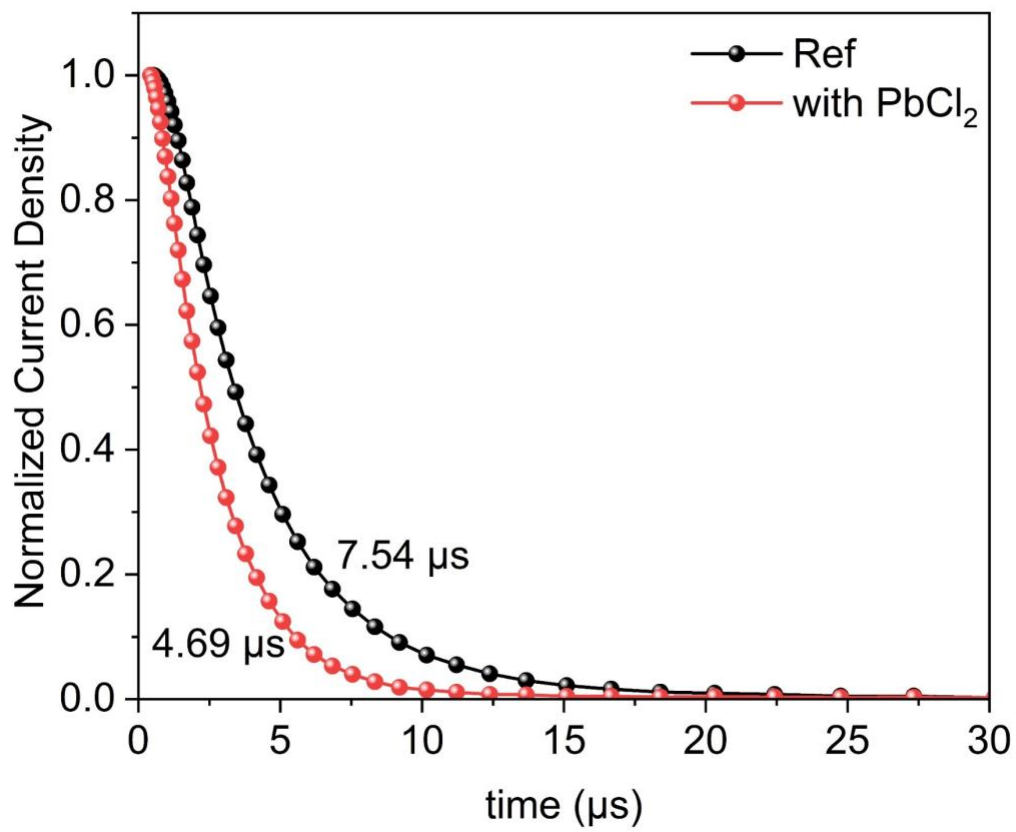

Fig. S21. Normalized TPC curves of the Ref and Cl-alloy mediated PSCs.

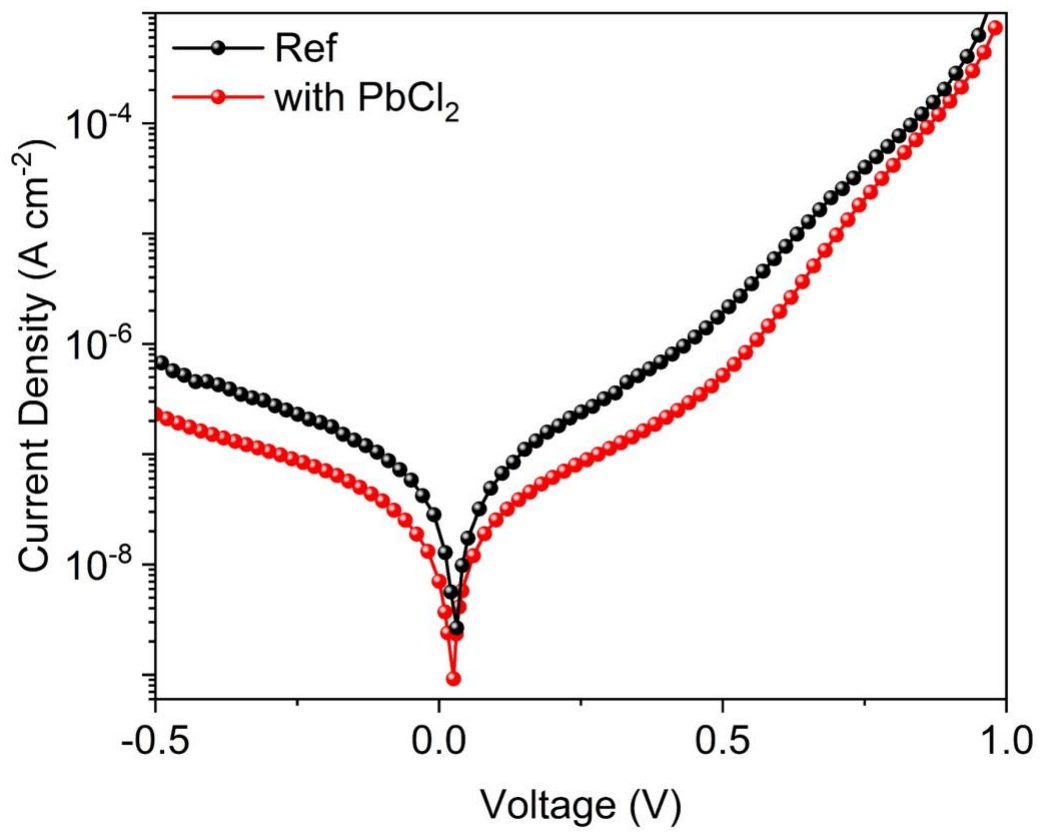

**Fig. S22.** Dark  $J$ - $V$  curves of the Ref and Cl-alloy mediated PSCs.

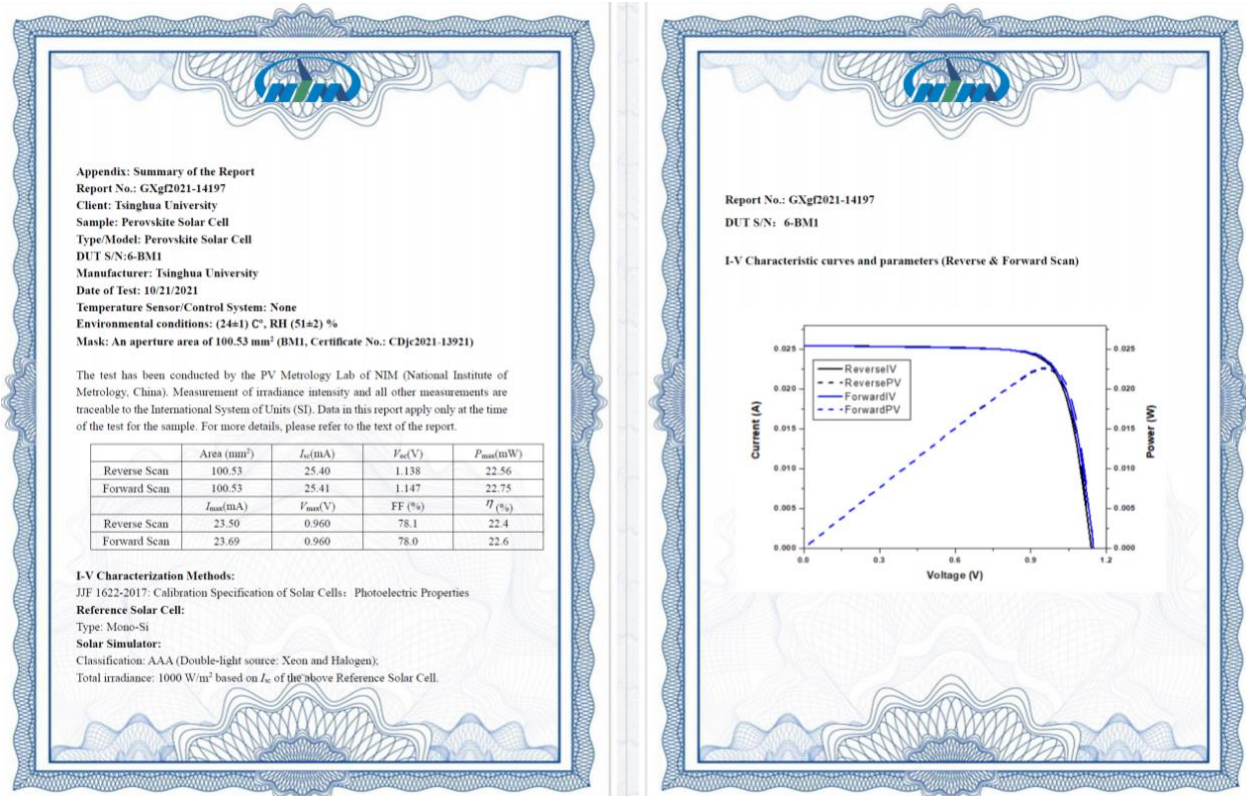

**Fig. S23. Certificated results from PV Metrology Lab of NIM (National Institute of Metrology, China).**

The aperture area of 1.0053 cm<sup>2</sup> was defined by a metal mask.



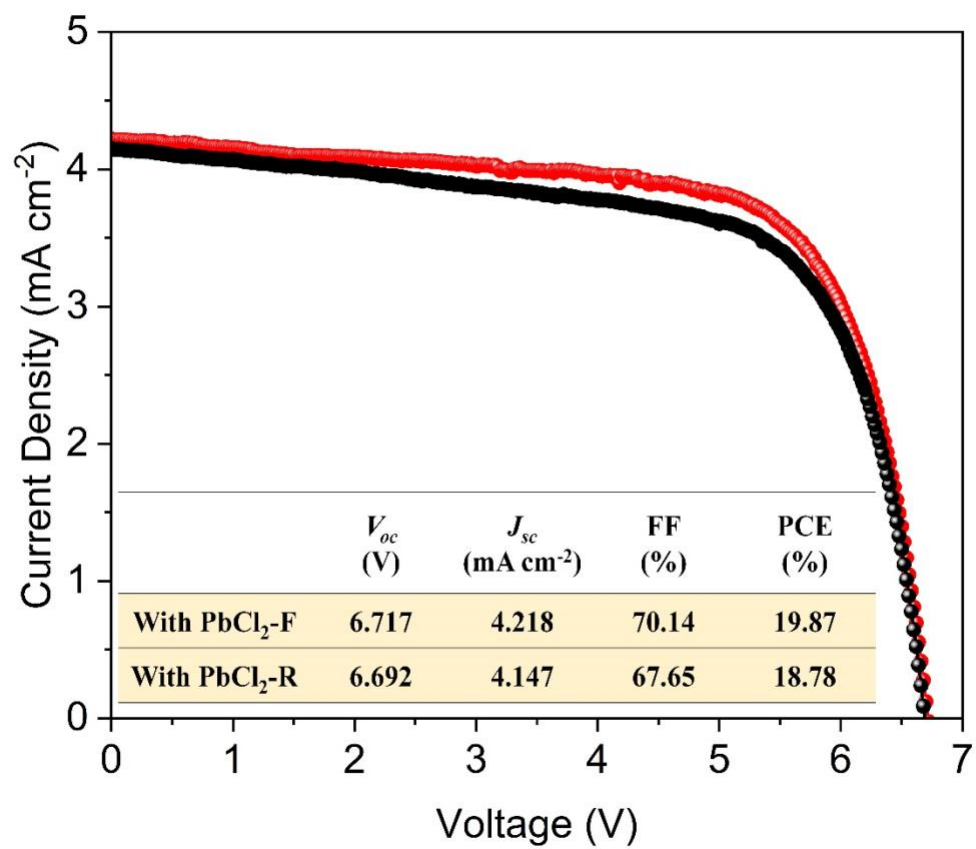

**Fig. S24.** *J-V* curve and corresponding parameters of the vacuum evaporated PSC module (14.4 cm<sup>2</sup> aperture area).

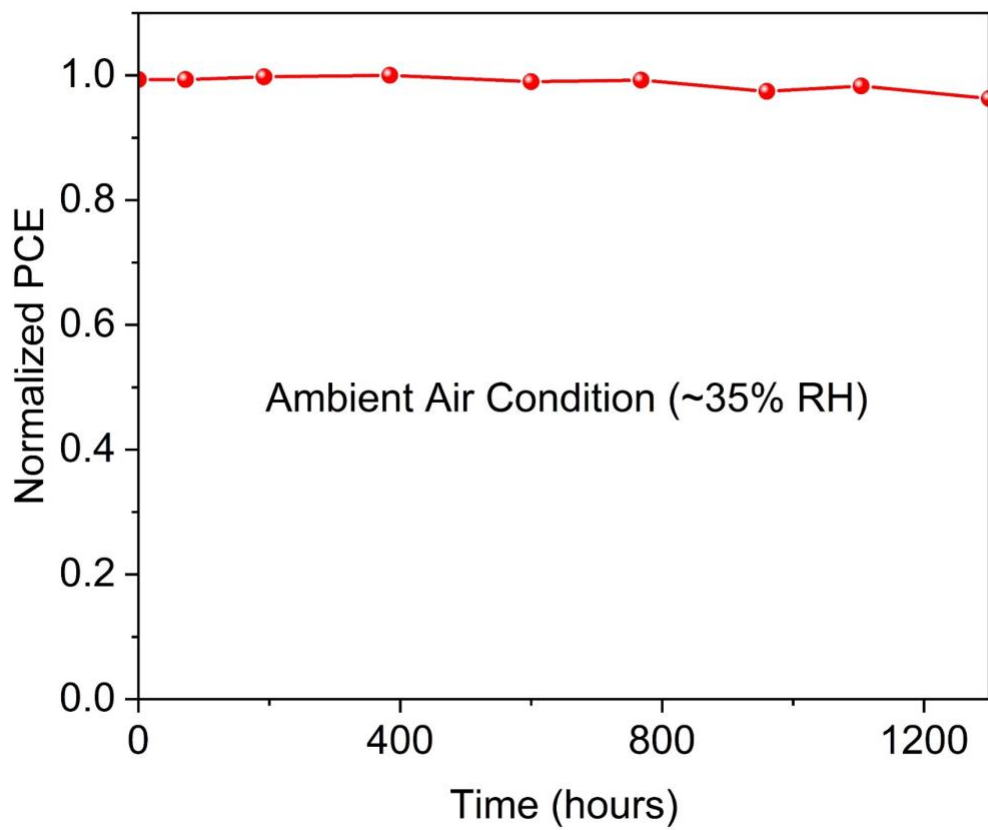

**Fig. S25. The long-term environmental stability of unencapsulated Cl-alloy mediated PSCs exposed to an atmospheric environment of 35% humidity in the dark.**

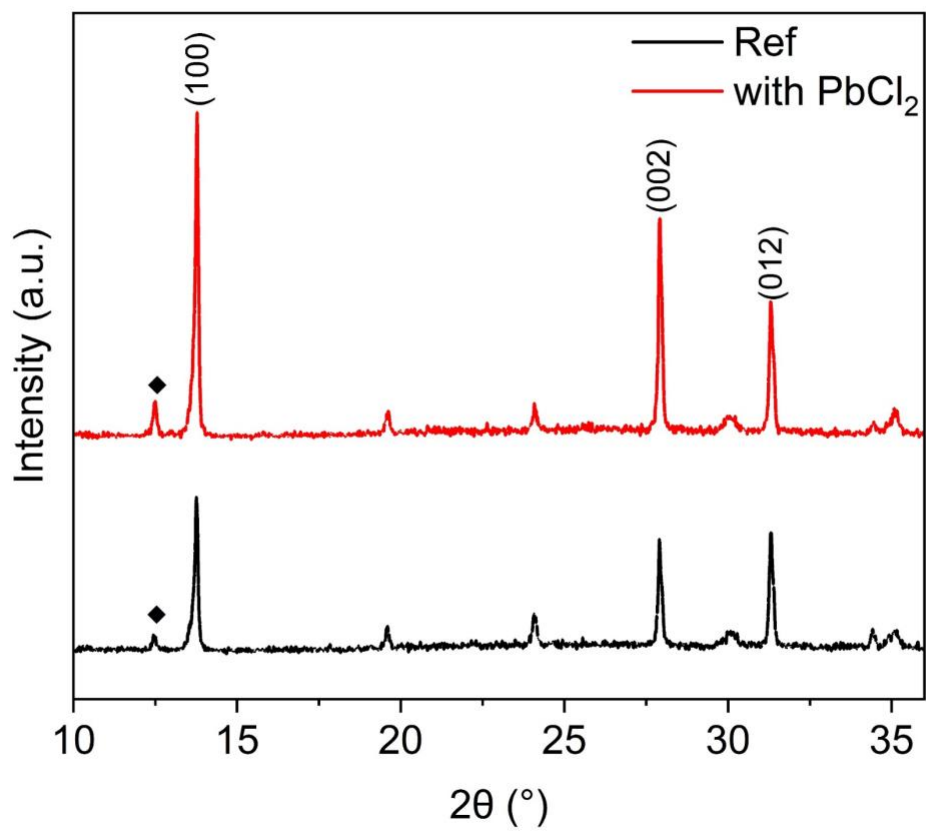

**Fig. S26.** XRD patterns of Cl-alloy mediated perovskite film and the Ref film after annealing at 170°C for 15 min in ambient air.

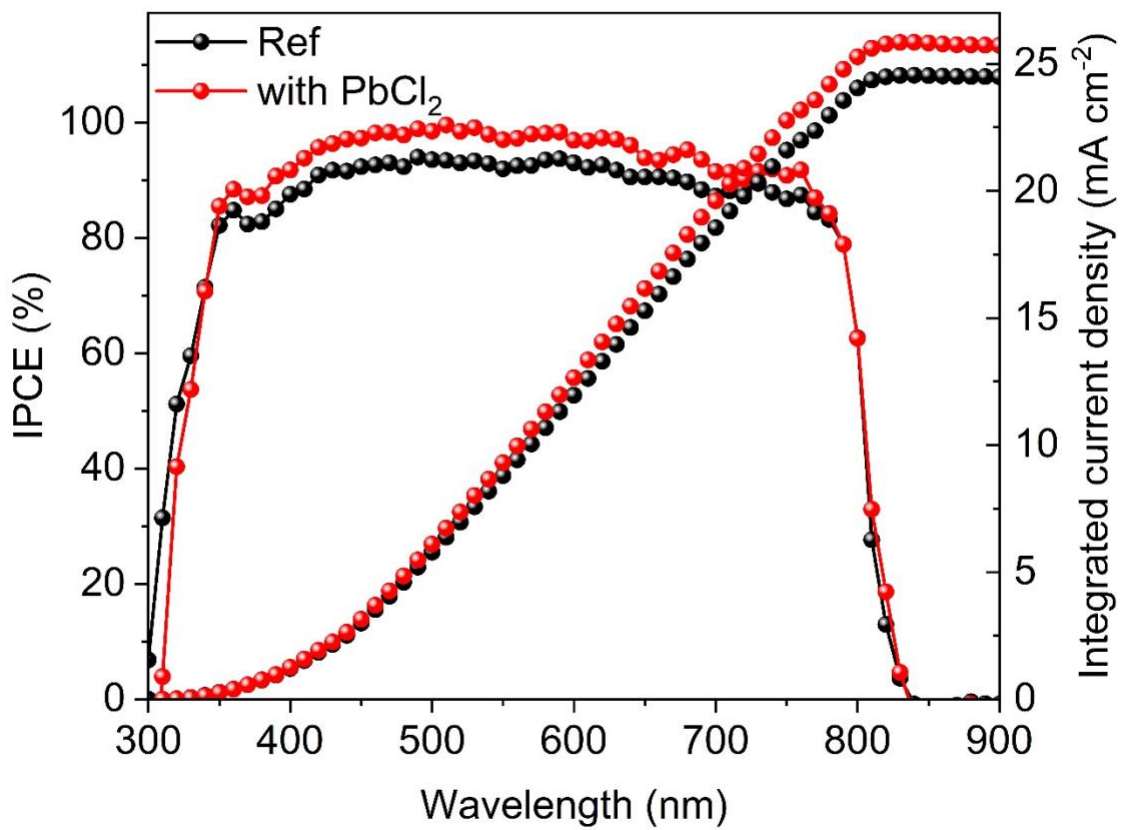

**Fig. S27.** IPCE curve of the Cl-alloy mediated PSC and the Ref PSC over 300 to 900 nm wavelengths and integrated  $J_{sc}$  over the AM1.5G standard spectrum.

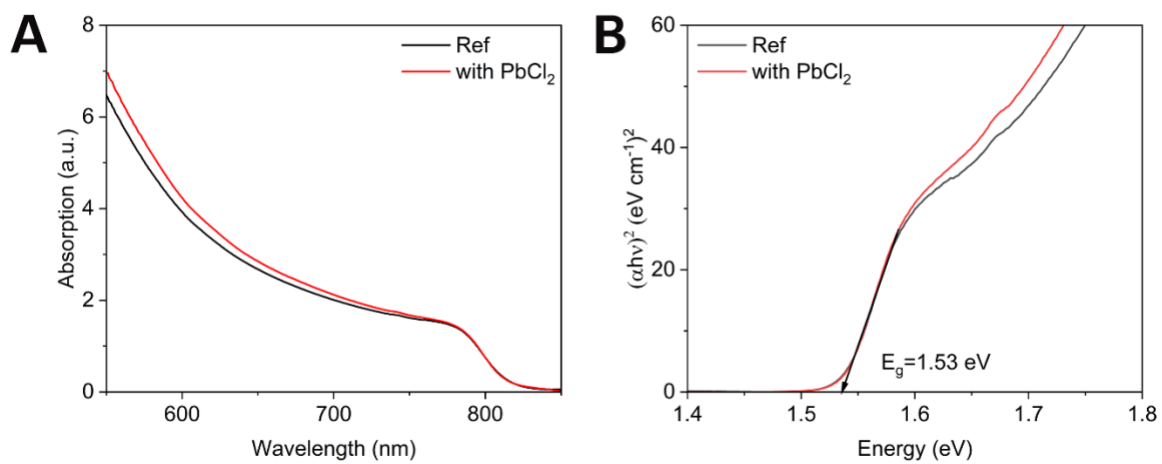

**Fig. S28. (A) UV-vis spectra and (B) Tauc plot of the Ref perovskite film and Cl-alloy mediated perovskite film.**

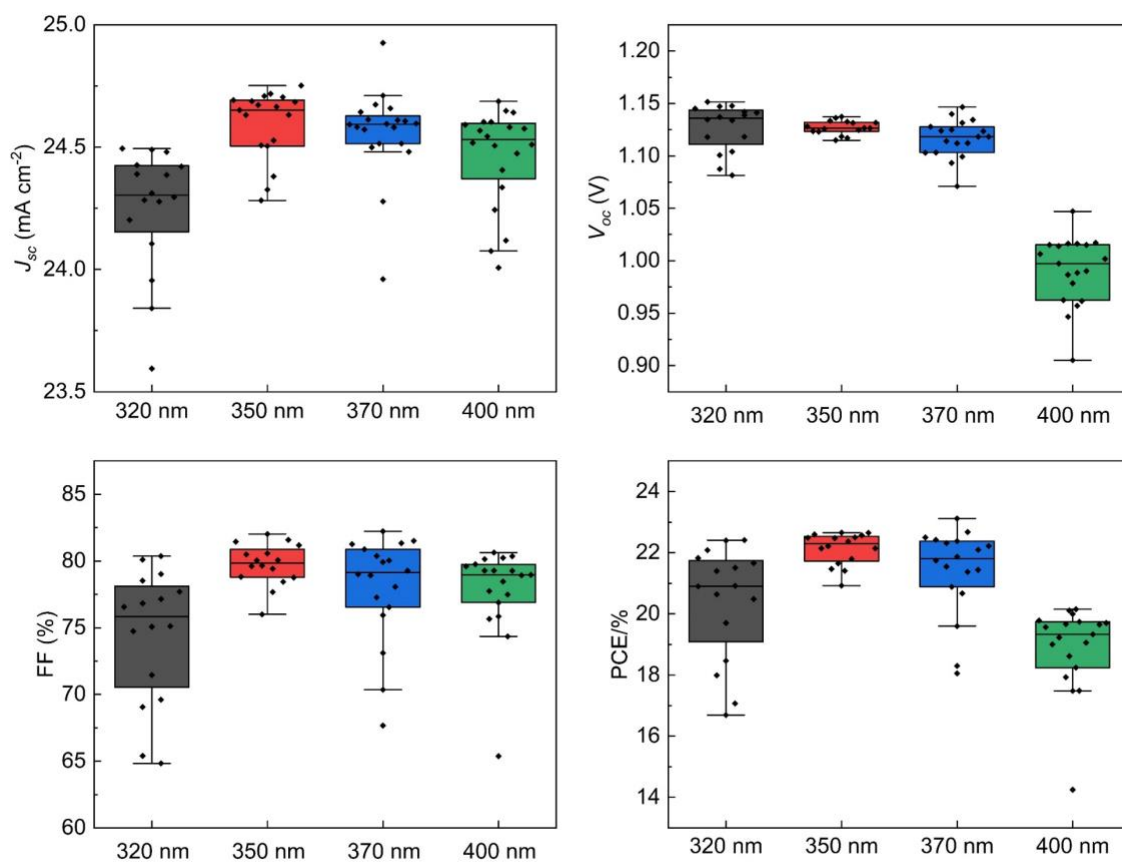

**Fig. S29. Statistics of photovoltaic parameters ( $J_{sc}$ ,  $V_{oc}$ , FF, PCE, respectively) of Cl-alloy mediated PSCs with different FAI thickness.**

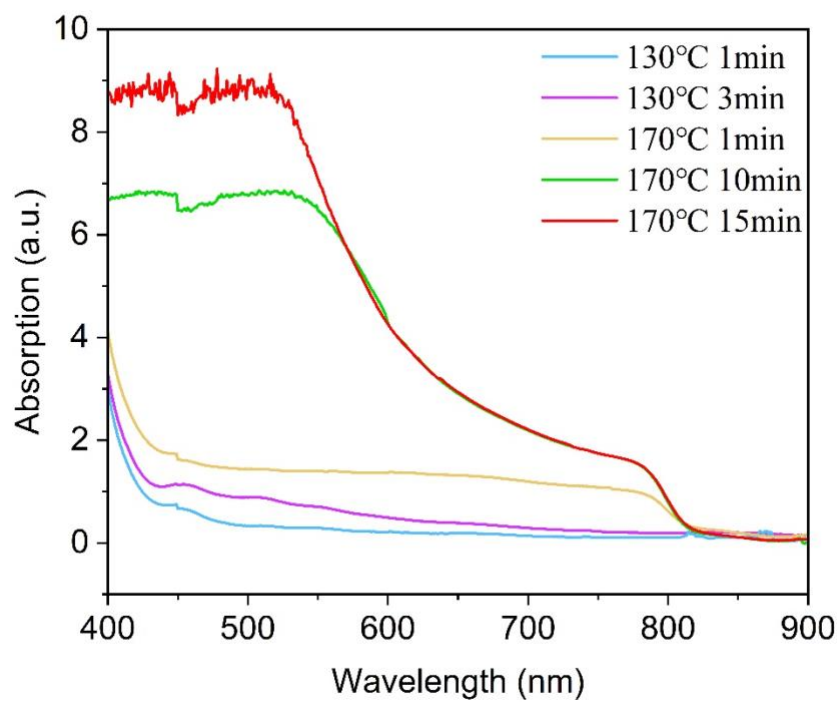

**Fig. S30.** UV-vis spectra of the Cl-alloy mediated perovskite film with different annealing temperature and time.

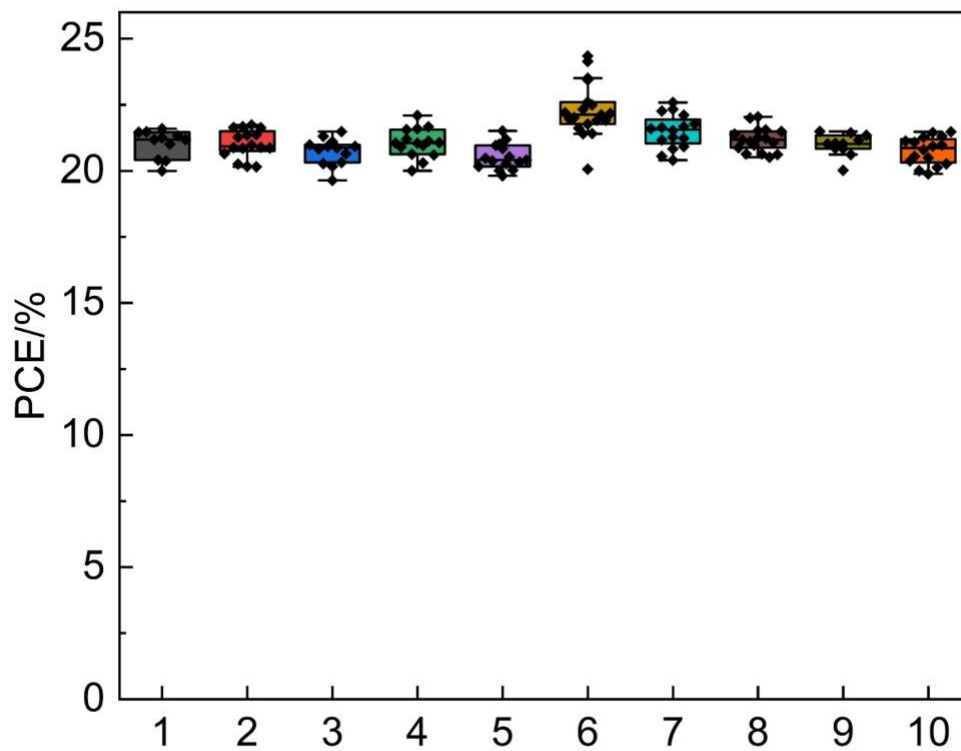

Fig. S31. PCE results from  $J-V$  measurement of 10 batches of CI-alloyed PSCs.



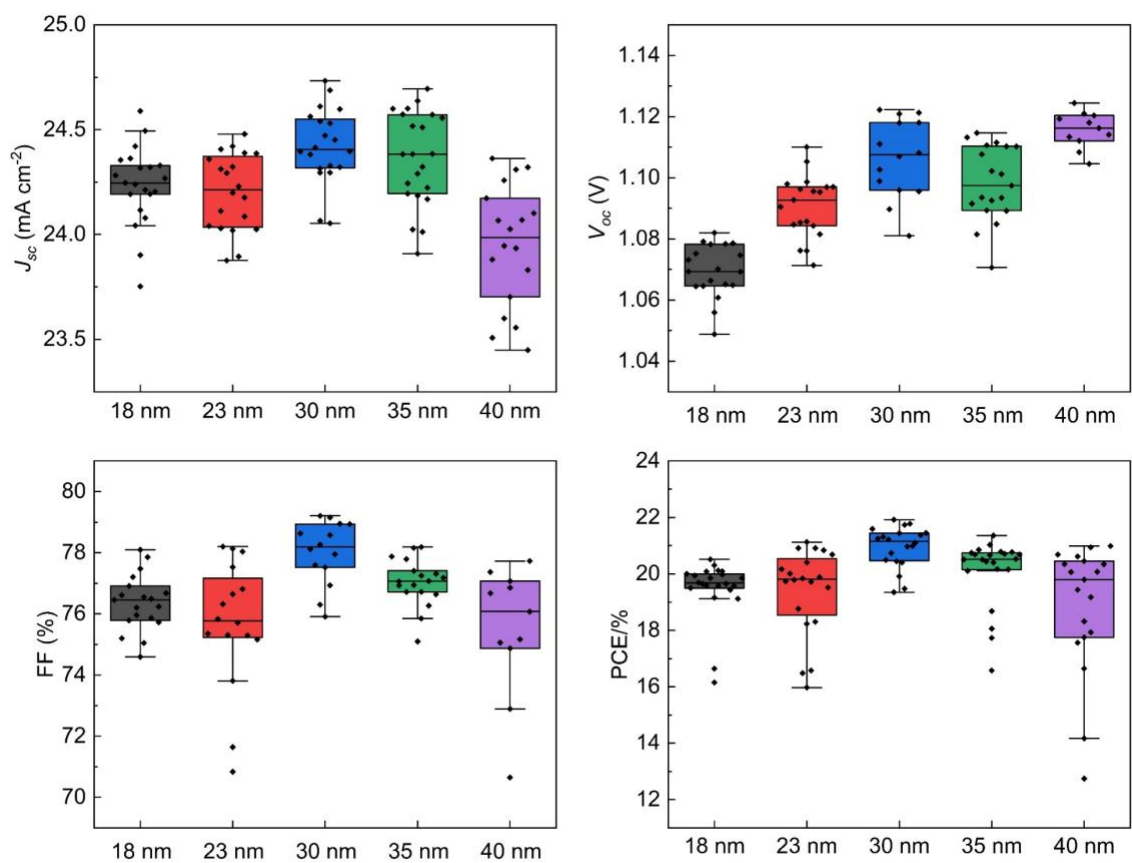

**Fig. S32. Statistics of photovoltaic parameters ( $J_{sc}$ ,  $V_{oc}$ , FF, PCE, respectively) of Cl-alloy mediated PSCs with different PbCl<sub>2</sub> thickness.**

**Movie S1.**

in-Operando GIWAXS of the PbCl<sub>2</sub>-alloyed perovskite films annealed at 130°C for 10 min and 170°C for 15 min.

**Movie S2.**

in-Operando GIWAXS of Ref perovskite films annealed at 130°C for 10 min and 170°C for 15 min.
